# Supplementary material
Source: publisher site journal article supplement (https://www.degruyter.com/publication/journal_key/JNET/downloadAsset/JNET_Call%20for%20papers%20JNET_2023.pdf)
Supplement: Supplementary file 1 [file JNET_Call%20for%20papers%20JNET_2023.pdf]

# Call for Papers!

## Invitation to contribute to *JNET*

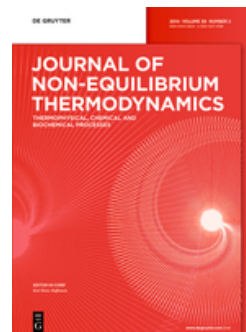

### Dear Friends of Non-Equilibrium Thermodynamics

*The Journal of Non-Equilibrium Thermodynamics – JNET*, founded by Jürgen Keller in 1976, serves as an international publication organ for new ideas, insights and results on non-equilibrium phenomena in science, engineering and related natural systems. As Editor-in-Chief I would like to kindly invite you to contribute a manuscript to *JNET*.

The **central aim** of the journal is to provide a bridge between science and engineering and to promote scientific exchange on

- newly observed non-equilibrium phenomena
- analytic or numeric modeling for their interpretation
- vanguard methods to describe non-equilibrium phenomena.

We want to emphasize that there will be **no page charges**, and **no charges for color figures**. Accepted papers are published ahead of print in an accelerated online-only format for immediate visibility within the scientific community. Manuscripts have to be submitted to and are professionally handled within *JNET*'s ScholarOne site at: <https://mc.manuscriptcentral.com/jnet>.

Of course, we will be happy to provide you with any assistance during the submission and publication process. For further information or your feedback on our proposal, please have a look at the journal's website at: [www.degruyter.com/jnet](http://www.degruyter.com/jnet) and do not hesitate to contact our Editorial Offices in Chemnitz ([ame.jnet@degruyter.com](mailto:ame.jnet@degruyter.com)).

We would be very honored if you accept this invitation to contribute to *JNET*. Thank you for your valuable support.

Sincerely and with kind regards

Prof. Dr. Karl Heinz Hoffmann, Editor-in-Chief

#### Editor-in-Chief:

Karl Heinz Hoffmann, Chemnitz, Germany

#### Editors:

Efstathios E. Michaelides, San Antonio, U.S.A.

Miguel Rubi, Barcelona, Spain

#### Assistant Managing Editor:

Janett Prehl, Chemnitz, Germany

#### Editorial Advisory Board

B. Andresen, Copenhagen, Denmark

V. Badescu, Bucharest, Romania

A. Bejan, Durham, U.S.A.

D. Brüggemann, Bayreuth, Germany

R. Buchholz, Erlangen, Germany

V. A. Cimmelli, Potenza, Italy

S. Defner, Baltimore, U.S.A.

F. Dinkelacker, Hannover, Germany

D. D. Do, Brisbane, Australia

J. Green, Boston, U.S.A.

M. Groll, Stuttgart, Germany

J. Gross, Stuttgart, Germany

D. Jou, Bellaterra, Spain

S. Kabelac, Hannover, Germany

S. Kalliadasis, London, UK

S. Kjelstrup, Trondheim, Norway

V. Klika, Prague, Czech Republic

C. Papenfuss, Berlin, Germany

M. Pavelka, Prague, Czech Republic

L. Restuccia, Messina, Italy

H. Stark, Berlin, Germany

A. Steinchen, Marseille, France

S. Stephan, Kaiserslautern, Germany

U. von Stockar, Lausanne, Switzerland

H. Struchtrup, Victoria, Canada

P. Ván, Budapest, Hungary

M. H. Zaman, Austin, U.S.A.

#### Honorary Board

B. Ahlborn, Vancouver, Canada

D. Bedeaux, Leiden, The Netherlands

R. Fox, Atlanta, U.S.A.

J.U. Keller, Siegen, Germany

N. Kizilova, Kharkov, Ukraine

W. Kollmann, Davis, U.S.A.

G. Lebon, Liège, Belgium

W. Muschik, Berlin, Germany

S. Sieniutycz, Warsaw, Poland

M. G. Velarde, Madrid, Spain

IMPACT FACTOR 2022: 6.6

*JNET* is listed by all major  
Abstracting & Indexing Services

#### Contact Information – Editor-in-Chief:

Prof. Dr. Karl Heinz Hoffmann, Technische Universität Chemnitz, 09107 Chemnitz, Germany  
T+49 (0)371.531-21950 · F+49 (0)371.53-21959 · [eic.jnet@degruyter.com](mailto:eic.jnet@degruyter.com)
